# Supplementary material for: Rapid Detection of Virus Nucleic Acid via Isothermal Amplification on Plasmonic Enhanced Digitizing Biosensor
Source: MDPI journal article supplement (doi:10.3390/bios12020075), 2022-01-28
Supplement: s1 [file s1]

Supplementary

# Rapid Detection of Virus Nucleic Acid via Isothermal Amplification on Plasmonic Enhanced Digitizing Biosensor

Shih-Chung Wei <sup>1,2</sup>, Chia-Chen Chang <sup>3,4</sup>, Tsung-Liang Chuang <sup>2</sup>, Kung-Bin Sung <sup>1</sup> and Chii-Wann Lin <sup>1,2,5,\*</sup>

<sup>1</sup> Institute of Biomedical Electronics and Bioinformatics, National Taiwan University, Taipei 10617, Taiwan; wshihchung@gmail.com (S.-C.W.); kbsung@ntu.edu.tw (K.-B.S.)

<sup>2</sup> Institute of Biomedical Engineering, National Taiwan University, Taipei 10617, Taiwan; light02062005@gmail.com

<sup>3</sup> Department of Medical Biotechnology and Laboratory Science, Chang Gung University, 33302, Taiwan; chang@mail.cgu.edu.tw

<sup>4</sup> Kidney Research Center, Department of Nephrology, Chang Gung Memorial Hospital, Taoyuan 33302, Taiwan

<sup>5</sup> Biomedical Technology and Device Research Laboratories, Industrial Technology Research Institute, Hsinchu 31057, Taiwan

\* Correspondence: cwlinx@ntu.edu.tw

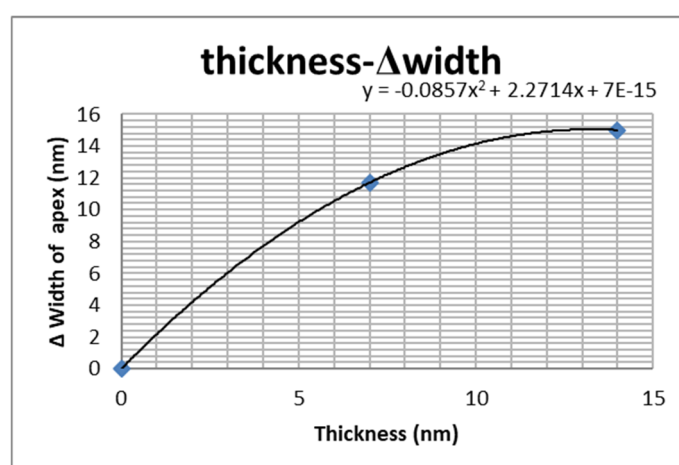

**Figure S1.** The relationship between Au sputtering film thickness and tip apex width.

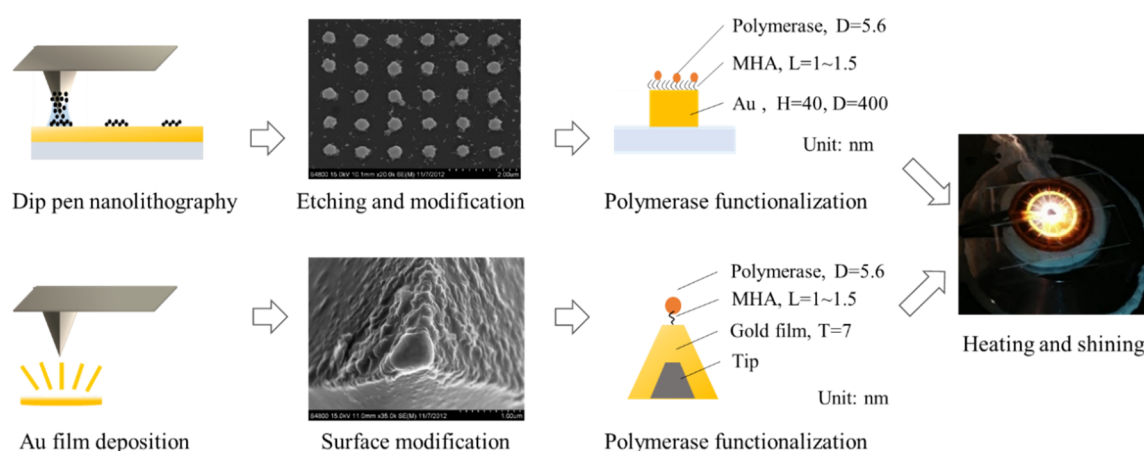

**Figure S2.** The illustration of surface modification and biomolecule conjugation for tip-LAMP and array-LAMP.

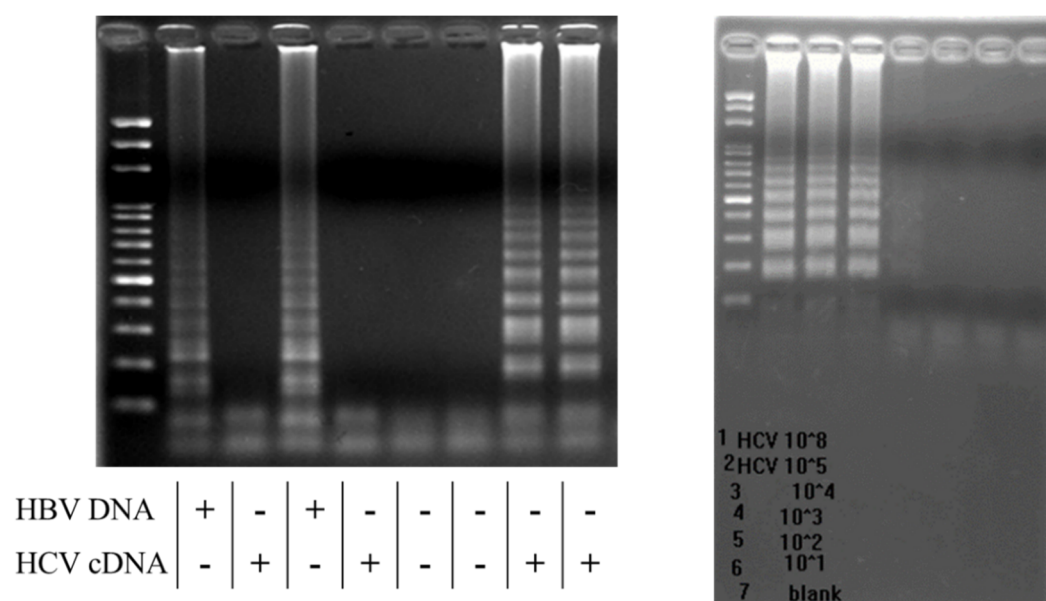

**Figure S3.** The verification of FRET LAMP reaction with gel electrophoresis.

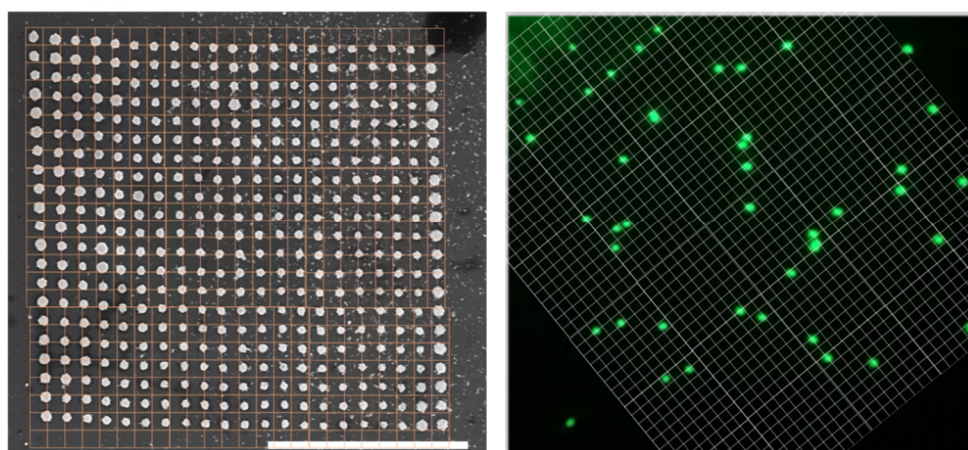

**Figure S4.** The SEM image of Dip-pen nanolithography fabricated nanoarray and the fluorescence image of FRET array-LMAP. A drifting of the pattern alignment might happen in DPN nanofabrication.
